# Supplementary material for: Metabarcoding monitoring analysis: the pros and cons of using co-extracted environmental DNA and RNA data to assess offshore oil production impacts on benthic communities
Source: PeerJ journal article supplement (doi:10.7717/peerj.3347), 2017-05-17
Supplement: Figure_S1.pdf [file Figure_S1.pdf]

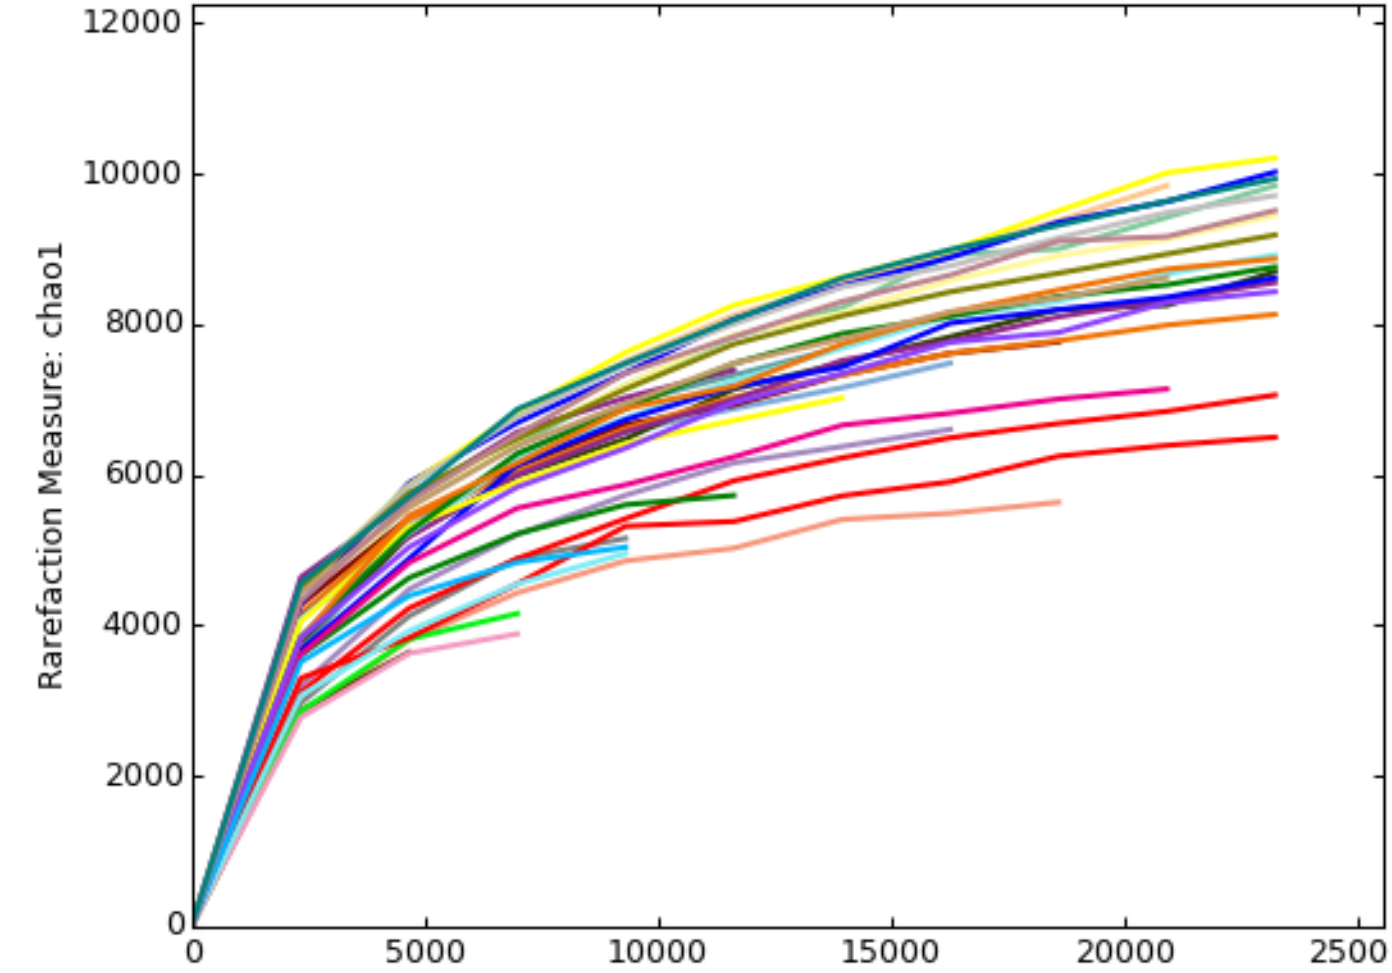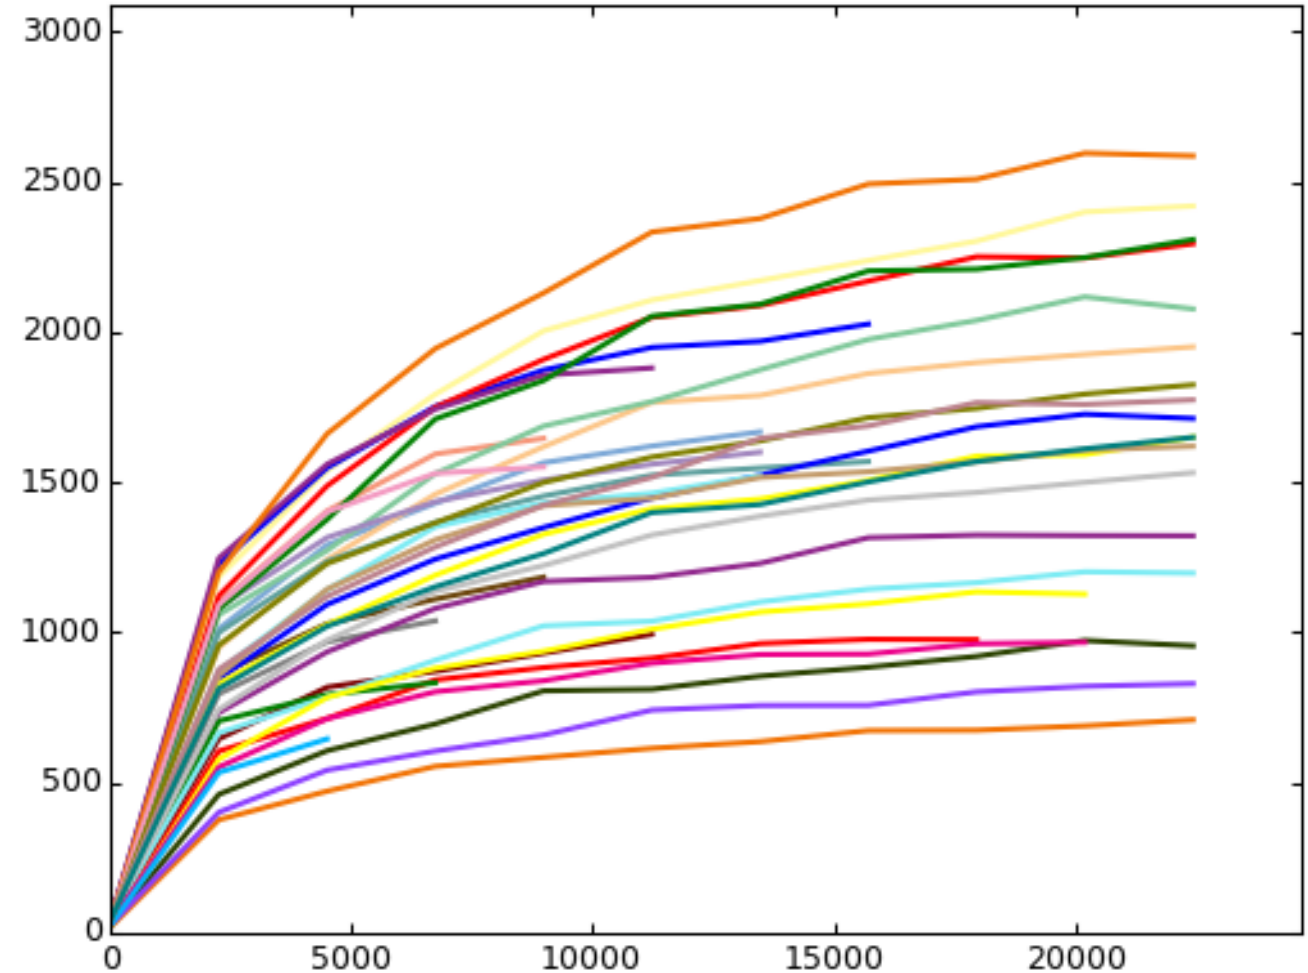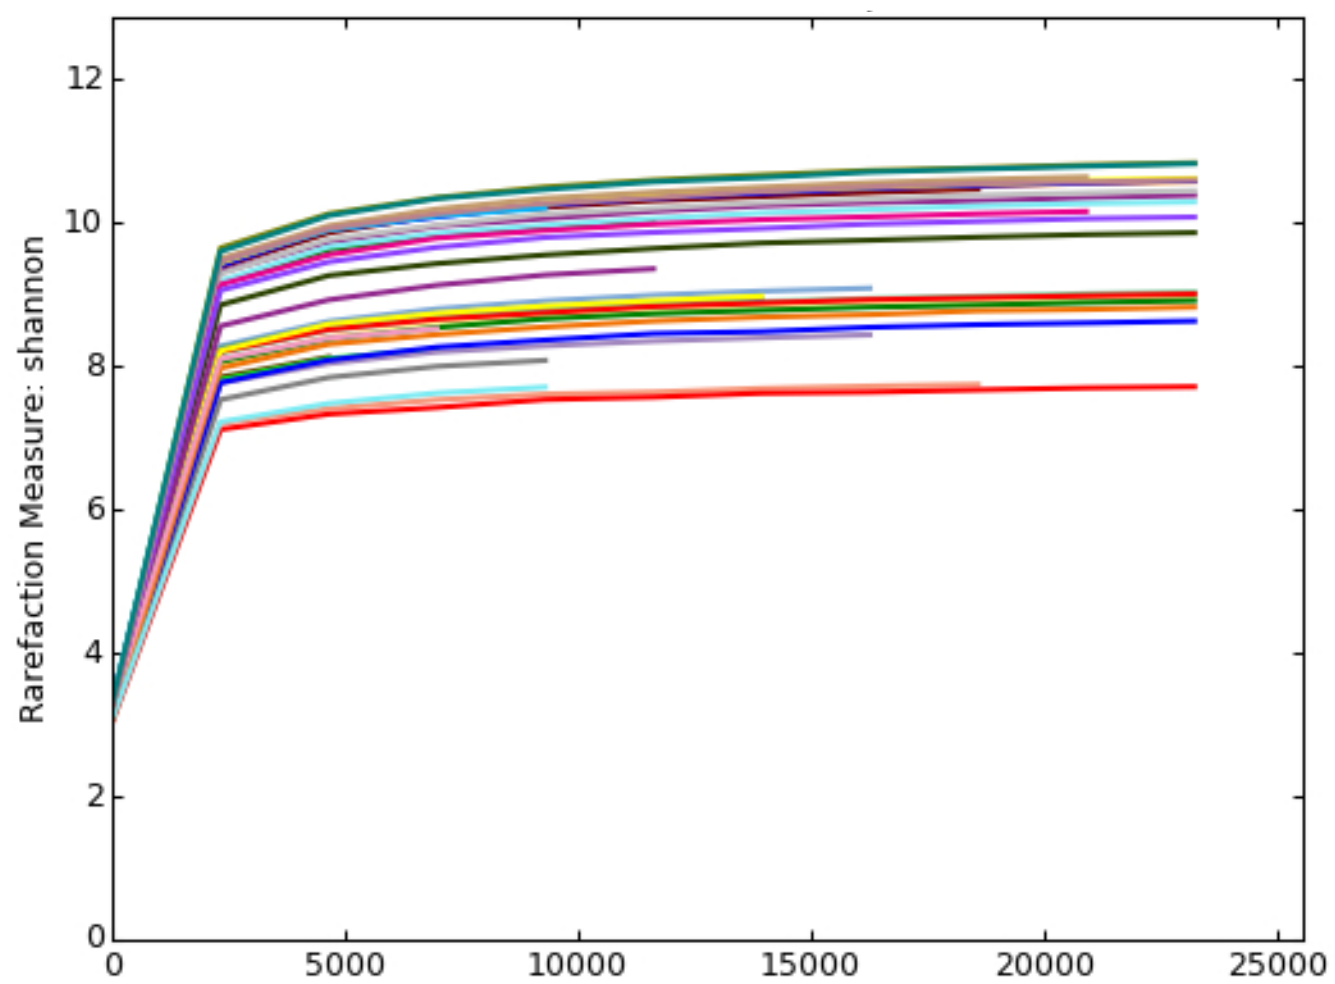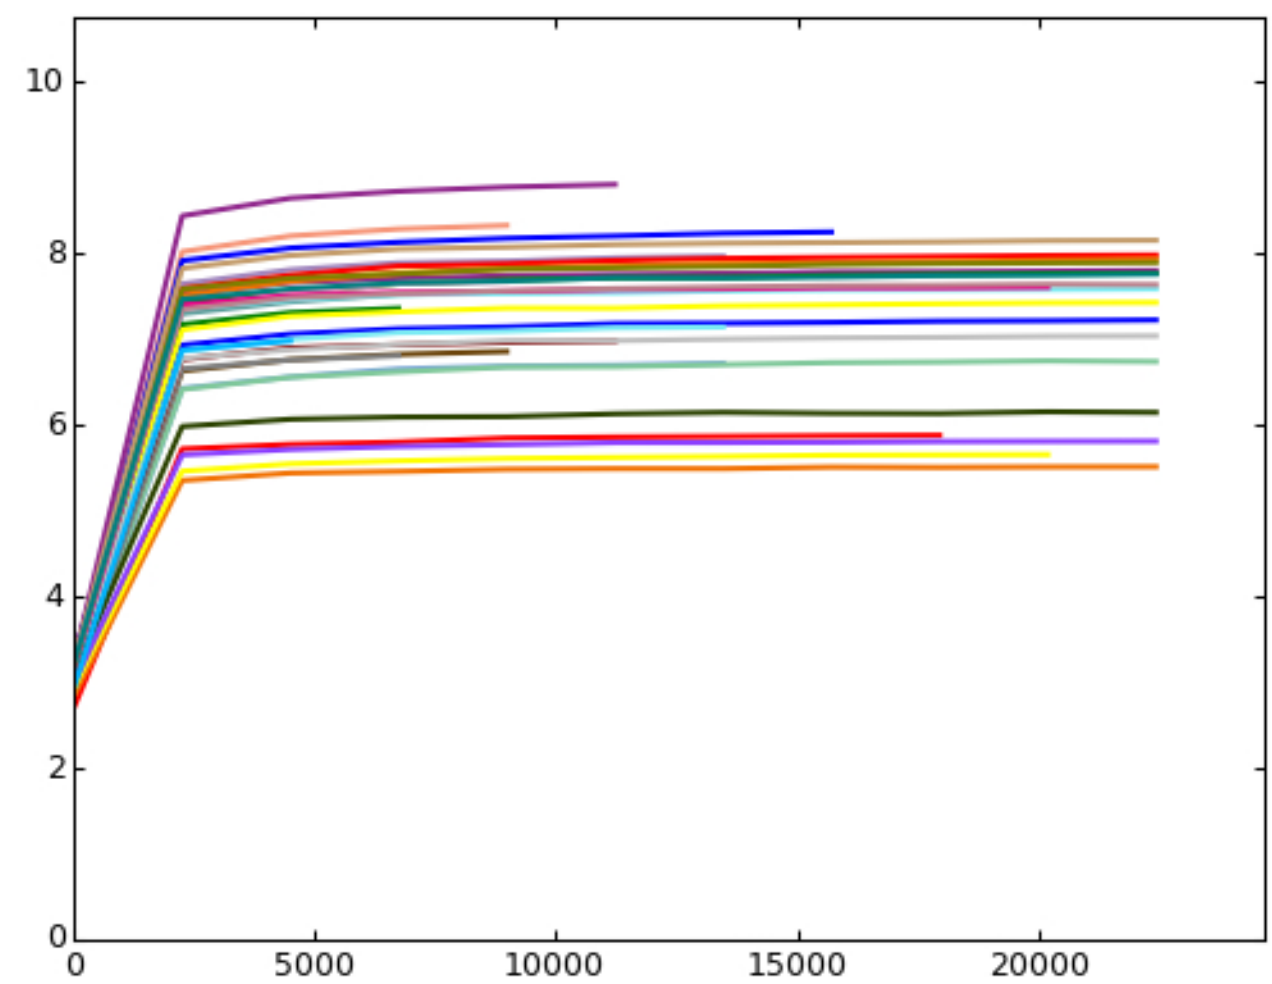

A) Bacteria

B) Eukaryotes
