# Supplementary material for: Metabarcoding monitoring analysis: the pros and cons of using co-extracted environmental DNA and RNA data to assess offshore oil production impacts on benthic communities
Source: PeerJ. 2017 May 17;5:e3347. doi: 10.7717/peerj.3347 (PMC5437860; doi:10.7717/peerj.3347)
Supplement: Table S1 [file peerj-05-3347-s002.xlsx]

## Sheet: Stations AWE
Station name	Sediment sample ID	Distance from FPSO	Sampling date	Depth (m)	Lat (DD)	Long (DD)	Amplicon name		Amplicon Result				Read counts
									Bacteria		Eukaryotes		Bacteria		Eukaryotes
							eDNA	eRNA	eRNA	eDNA	eRNA	eDNA	eRNA	eDNA	eRNA	eDNA
FW1000	FW1000a	1000m West	15.03.15	103	-39 58.3555	173 17.1303	BED_42	BEC_42	S	S	S	S	27383	37678	30583	29092
	FW1000b	1000m West	15.03.15	103	-39 58.3574	173 17.1306	BED_43	BEC_43	S	S	S	S	24099	21023	16533	22338
	FW1000c	1000m West	15.03.15	103	-39 58.3541	173 17.1379	BED_44	BEC_44	S	S	S	S	30089	10299	30555	6707
FW500	FW500b	500m West	15.03.15	103	-39 58.3543	173 17.4841	BED_45	BEC_45	S	S	S	S	24975	22917	33730	22559
	FW500a	500m West	15.03.15	103	-39 58.3548	173 17.4764	BED_46	BEC_46	S	S	S	S	12314	31258	12186	29257
	FW500c	500m West	15.03.15	103	-39 58.3541	173 17.4937	BED_47	BEC_47	S	S	S	S	15403	38762	21079	22741
FW250	FW250a	250 West	15.03.15	102	-39 58.3587	173 17.6641	BED_48	BEC_48	S	S	S	S	11009	38715	15669	35125
	FW250b	250 West	15.03.15	102	-39 58.3512	173 17.6551	BED_49	BEC_49	S	S	S	S	7807	38784	9865	36378
	FW250c	250 West	15.03.15	102	-39 58.3529	173 17.6594	BED_50	BEC_50	S	S	S	S	14046	19166	16904	12118
FE250	FE250a	250 Est	15.03.15	102	-39 58.3520	173 18.0069	BED_51	BEC_51	S	S	S	S	6607	43731	9393	35183
	FE250b	250 Est	15.03.15	102	-39 58.3500	173 18.0132	BED_52	BEC_52	S	S	S	S	11251	523	8411	500
	FE250c	250 Est	15.03.15	102	-39 58.3565	173 18.0080	BED_53	BEC_53	S	S	S	S	8482	26599	19	18667
FE500	FE500a	500 Est	15.03.15	100	-39 58.3505	173 18.1862	BED_54	BEC_54	S	S	S	S	19483	40785	10632	29324
	FE500b	500 Est	15.03.15	100	-39 58.3512	173 18.1893	BED_55	BEC_55	S	S	S	S	17096	23420	15196	23721
	FE500c	500 Est	15.03.15	100	-39 58.3544	173 18.1834	BED_56	BEC_56	S	S	S	S	23061	12698	26832	7356
FE1000	FE1000a	1000 Est	15.03.15	100	-39 58.3561	173 18.5400	BED_57	BEC_57	S	S	S	S	47073	29861	39933	22765
	FE1000b	1000 Est	15.03.15	100	-39 58.3552	173 18.5303	BED_58	BEC_58	S	S	S	S	17895	45096	13577	34418
	FE1000c	1000 Est	15.03.15	100	-39 58.3576	173 18.5340	BED_59	BEC_59	S	S	S	S	35555	48388	42506	26522
Samples discarded prior to statistical analysis
