# Supplementary material for: Metabarcoding monitoring analysis: the pros and cons of using co-extracted environmental DNA and RNA data to assess offshore oil production impacts on benthic communities
Source: PeerJ. 2017 May 17;5:e3347. doi: 10.7717/peerj.3347 (PMC5437860; doi:10.7717/peerj.3347)
Supplement: Table S4 [file peerj-05-3347-s005.xlsx]

## Sheet: Bacteria eDNA
Domain	Phylum	Class	Read abundance	Percentage
Bacteria	Proteobacteria	Gammaproteobacteria	66648	69.4626
Bacteria	Proteobacteria	Deltaproteobacteria	9407	9.80427
Bacteria	Proteobacteria	Alphaproteobacteria	7517	7.83445
Bacteria	Acidobacteria	Acidobacteria_Gp22	1495	1.55814
Bacteria	Nitrospirae	Nitrospira	1108	1.15479
Bacteria	Acidobacteria	Acidobacteria_Gp21	832	0.867136
Bacteria	Actinobacteria	Actinobacteria	774	0.806687
Bacteria	Planctomycetes	Planctomycetia	712	0.742069
Bacteria	Acidobacteria	Acidobacteria_Gp6	694	0.723308
Bacteria	Acidobacteria	Acidobacteria_Gp10	671	0.699337
Bacteria	Proteobacteria	Betaproteobacteria	587	0.61179
Bacteria	Nitrospinae	Nitrospinia	552	0.575312
Bacteria	Bacteroidetes	Flavobacteriia	516	0.537791
Bacteria	Firmicutes	Clostridia	463	0.482553
Bacteria	Verrucomicrobia	Verrucomicrobiae	381	0.39709
Bacteria	Acidobacteria	Acidobacteria_Gp9	357	0.372077
Bacteria	Acidobacteria	Acidobacteria_Gp16	321	0.334556
Bacteria	Bacteroidetes	Cytophagia	279	0.290783
Bacteria	Synergistetes	Synergistia	264	0.275149
Bacteria	Latescibacteria	_	213	0.221995
Bacteria	Acidobacteria	Acidobacteria_Gp3	188	0.195939
Bacteria	Acidobacteria	Acidobacteria_Gp17	147	0.153208
Bacteria	Gemmatimonadetes	Gemmatimonadetes	134	0.139659
Bacteria	Acidobacteria	Acidobacteria_Gp26	128	0.133406
Bacteria	Poribacteria	_	123	0.128194
Bacteria	Acidobacteria	Acidobacteria_Gp23	114	0.118814
Bacteria	Armatimonadetes	Chthonomonadetes	113	0.117772
Bacteria	Lentisphaerae	Oligosphaeria	76	0.0792096
Bacteria	Verrucomicrobia	Spartobacteria	72	0.0750406
Bacteria	Hydrogenedentes	Candidatus_Hydrogenedens	72	0.0750406
Bacteria	Firmicutes	Negativicutes	68	0.0708717
Bacteria	Bacteroidetes	Sphingobacteriia	59	0.0614916
Bacteria	Deinococcus-Thermus	Deinococci	55	0.0573227
Bacteria	BRC1	_	55	0.0573227
Bacteria	Acidobacteria	Acidobacteria_Gp7	52	0.054196
Bacteria	Deferribacteres	Deferribacteres	52	0.054196
Bacteria	Acidobacteria	Acidobacteria_Gp1	44	0.0458582
Bacteria	Verrucomicrobia	Opitutae	44	0.0458582
Bacteria	Acidobacteria	Acidobacteria_Gp5	42	0.0437737
Bacteria	Armatimonadetes	Armatimonadetes_gp2	40	0.0416892
Bacteria	Acidobacteria	Acidobacteria_Gp4	37	0.0385626
Bacteria	Acidobacteria	Acidobacteria_Gp24	35	0.0364781
Bacteria	Ignavibacteriae	Ignavibacteria	31	0.0323092
Bacteria	Chloroflexi	Chloroflexia	30	0.0312669
Bacteria	Chloroflexi	Caldilineae	28	0.0291825
Bacteria	Verrucomicrobia	Subdivision3	28	0.0291825
Bacteria	Proteobacteria	Epsilonproteobacteria	28	0.0291825
Bacteria	Acidobacteria	Acidobacteria_Gp18	27	0.0281402
Bacteria	Parcubacteria	_	26	0.027098
Bacteria	Verrucomicrobia	Subdivision5	24	0.0250135
Bacteria	Thermodesulfobacteria	Thermodesulfobacteria	22	0.0229291
Bacteria	Firmicutes	Bacilli	22	0.0229291
Bacteria	Spirochaetes	Spirochaetia	18	0.0187602
Bacteria	Chlamydiae	Chlamydiia	15	0.0156335
Bacteria	Armatimonadetes	Armatimonadetes_gp5	12	0.0125068
Bacteria	Cyanobacteria_Chloroplast	Cyanobacteria	10	0.0104223
Bacteria	Armatimonadetes	Armatimonadetes_gp4	9	0.00938008
Bacteria	Aminicenantes	_	9	0.00938008
Bacteria	SR1	_	7	0.00729562
Bacteria	Armatimonadetes	Armatimonadia	7	0.00729562
Bacteria	Chloroflexi	Thermomicrobia	6	0.00625339
Bacteria	Bacteroidetes	Bacteroidia	6	0.00625339
Bacteria	Cyanobacteria_Chloroplast	Chloroplast	5	0.00521116
Bacteria	Acidobacteria	Acidobacteria_Gp19	5	0.00521116
Bacteria	Chloroflexi	Ktedonobacteria	4	0.00416892
Bacteria	Firmicutes	Thermolithobacteria	3	0.00312669
Bacteria	Acidobacteria	Acidobacteria_Gp15	3	0.00312669
Archaea	Thaumarchaeota	Nitrosopumilales	3	0.00312669
Bacteria	Fusobacteria	Fusobacteriia	2	0.00208446
Bacteria	Chlorobi	Chlorobia	2	0.00208446
Bacteria	Bacteroidetes	Bacteroidetes_incertae_sedis	2	0.00208446
Bacteria	Acidobacteria	Holophagae	2	0.00208446
Bacteria	Candidatus_Saccharibacteria	_	2	0.00208446
Bacteria	Tenericutes	Mollicutes	2	0.00208446
Bacteria	Elusimicrobia	Endomicrobia	2	0.00208446
Bacteria	Aquificae	Aquificae	1	0.00104223
Bacteria	Chloroflexi	Dehalococcoidetes	1	0.00104223
Bacteria	Thermotogae	Thermotogae	1	0.00104223
Bacteria	Planctomycetes	Phycisphaerae	1	0.00104223
Bacteria	Microgenomates	_	1	0.00104223

## Sheet: Bacteria eRNA
Domain	Phylum	Class	Read abundance	Percentage
Bacteria	Proteobacteria	Gammaproteobacteria	79704	83.07
Bacteria	Proteobacteria	Deltaproteobacteria	5556	5.79064
Bacteria	Proteobacteria	Alphaproteobacteria	3899	4.06366
Bacteria	Acidobacteria	Acidobacteria_Gp22	1310	1.36532
Bacteria	Planctomycetes	Planctomycetia	493	0.51382
Bacteria	Nitrospirae	Nitrospira	407	0.424188
Bacteria	Actinobacteria	Actinobacteria	395	0.411681
Bacteria	Acidobacteria	Acidobacteria_Gp6	334	0.348105
Bacteria	Firmicutes	Clostridia	306	0.318923
Bacteria	Acidobacteria	Acidobacteria_Gp10	302	0.314754
Bacteria	Acidobacteria	Acidobacteria_Gp21	261	0.272022
Bacteria	Nitrospinae	Nitrospinia	209	0.217826
Bacteria	Bacteroidetes	Flavobacteriia	186	0.193855
Bacteria	Verrucomicrobia	Verrucomicrobiae	185	0.192813
Bacteria	Latescibacteria	_	172	0.179264
Bacteria	Acidobacteria	Acidobacteria_Gp3	156	0.162588
Bacteria	Acidobacteria	Acidobacteria_Gp9	156	0.162588
Bacteria	Acidobacteria	Acidobacteria_Gp16	154	0.160504
Bacteria	Bacteroidetes	Cytophagia	149	0.155292
Bacteria	Proteobacteria	Betaproteobacteria	146	0.152166
Bacteria	Synergistetes	Synergistia	102	0.106308
Bacteria	Gemmatimonadetes	Gemmatimonadetes	99	0.103181
Bacteria	Fusobacteria	Fusobacteriia	86	0.0896319
Bacteria	Acidobacteria	Acidobacteria_Gp17	85	0.0885897
Bacteria	Acidobacteria	Acidobacteria_Gp26	82	0.085463
Bacteria	Acidobacteria	Acidobacteria_Gp23	79	0.0823363
Bacteria	Lentisphaerae	Oligosphaeria	64	0.0667028
Bacteria	Hydrogenedentes	Candidatus_Hydrogenedens	62	0.0646183
Bacteria	Armatimonadetes	Chthonomonadetes	57	0.0594072
Bacteria	Acidobacteria	Acidobacteria_Gp7	53	0.0552383
Bacteria	Deinococcus-Thermus	Deinococci	50	0.0521116
Bacteria	Bacteroidetes	Sphingobacteriia	44	0.0458582
Bacteria	Verrucomicrobia	Spartobacteria	41	0.0427315
Bacteria	Acidobacteria	Acidobacteria_Gp1	38	0.0396048
Bacteria	BRC1	_	36	0.0375203
Bacteria	Poribacteria	_	32	0.0333514
Bacteria	Acidobacteria	Acidobacteria_Gp18	30	0.0312669
Bacteria	Verrucomicrobia	Subdivision3	28	0.0291825
Bacteria	Verrucomicrobia	Opitutae	28	0.0291825
Bacteria	Proteobacteria	Epsilonproteobacteria	27	0.0281402
Bacteria	Thermodesulfobacteria	Thermodesulfobacteria	26	0.027098
Bacteria	Acidobacteria	Acidobacteria_Gp24	25	0.0260558
Bacteria	Firmicutes	Bacilli	24	0.0250135
Bacteria	Acidobacteria	Acidobacteria_Gp5	24	0.0250135
Bacteria	Armatimonadetes	Armatimonadetes_gp2	23	0.0239713
Bacteria	Firmicutes	Negativicutes	21	0.0218869
Bacteria	Parcubacteria	_	20	0.0208446
Bacteria	Deferribacteres	Deferribacteres	15	0.0156335
Bacteria	Ignavibacteriae	Ignavibacteria	12	0.0125068
Bacteria	Armatimonadetes	Armatimonadetes_gp5	12	0.0125068
Bacteria	Chlamydiae	Chlamydiia	12	0.0125068
Bacteria	Bacteroidetes	Bacteroidia	10	0.0104223
Bacteria	Chloroflexi	Caldilineae	10	0.0104223
Bacteria	Spirochaetes	Spirochaetia	10	0.0104223
Bacteria	SR1	_	9	0.00938008
Bacteria	Cyanobacteria_Chloroplast	Cyanobacteria	9	0.00938008
Bacteria	Acidobacteria	Acidobacteria_Gp4	9	0.00938008
Bacteria	Verrucomicrobia	Subdivision5	9	0.00938008
Bacteria	Chloroflexi	Chloroflexia	8	0.00833785
Bacteria	Armatimonadetes	Armatimonadetes_gp4	7	0.00729562
Bacteria	Firmicutes	Thermolithobacteria	7	0.00729562
Bacteria	Chloroflexi	Thermomicrobia	7	0.00729562
Bacteria	Armatimonadetes	Armatimonadia	5	0.00521116
Bacteria	Acidobacteria	Acidobacteria_Gp15	5	0.00521116
Bacteria	Thermotogae	Thermotogae	4	0.00416892
Bacteria	Aminicenantes	_	3	0.00312669
Bacteria	Cyanobacteria_Chloroplast	Chloroplast	2	0.00208446
Bacteria	Acidobacteria	Acidobacteria_Gp19	2	0.00208446
Bacteria	Acidobacteria	Acidobacteria_Gp14	2	0.00208446
Archaea	Thaumarchaeota	Nitrosopumilales	2	0.00208446
Bacteria	Chlorobi	Chlorobia	1	0.00104223
Bacteria	Chloroflexi	Dehalococcoidetes	1	0.00104223
Bacteria	Bacteroidetes	Bacteroidetes_incertae_sedis	1	0.00104223
Bacteria	Chloroflexi	Dehalococcoidia	1	0.00104223
Bacteria	Planctomycetes	Phycisphaerae	1	0.00104223
Bacteria	Acidobacteria	Holophagae	1	0.00104223
Bacteria	Candidatus_Saccharibacteria	_	1	0.00104223
Bacteria	candidate_division_WPS-2	_	1	0.00104223
Bacteria	Chloroflexi	Anaerolineae	1	0.00104223
Bacteria	Elusimicrobia	Endomicrobia	1	0.00104223
Bacteria	Chloroflexi	Ktedonobacteria	1	0.00104223

## Sheet: Eukaryote eDNA
Domain	Supergroups & kindoms	Phylum	Read abundance	Percentage
Eukaryota	Opisthokonta	Metazoa	65024	91.0802
Eukaryota	Alveolata	Dinophyta	2229	3.1222
Eukaryota	Rhizaria	Cercozoa	1562	2.18792
Eukaryota	Rhizaria	Radiolaria	959	1.34329
Eukaryota	Alveolata	Apicomplexa	894	1.25224
Eukaryota	Alveolata	Ciliophora	280	0.392201
Eukaryota	Alveolata	Perkinsea	217	0.303956
Eukaryota	Archaeplastida	Chlorophyta	83	0.11626
Eukaryota	Opisthokonta	Fungi	57	0.0798409
Eukaryota	Amoebozoa	Amoebozoa_X	42	0.0588301
Eukaryota	Alveolata	Alveolata_X	21	0.0294151
Eukaryota	Hacrobia	Centroheliozoa	5	0.00700359
Eukaryota	Hacrobia	Haptophyta	3	0.00420215
Eukaryota	Opisthokonta	Opisthokonta_X	3	0.00420215
Eukaryota	Stramenopiles	Stramenopiles_X	3	0.00420215
Eukaryota	Opisthokonta	Mesomycetozoa	2	0.00280143
Eukaryota	Opisthokonta	Choanoflagellida	2	0.00280143
Eukaryota	Apusozoa	Apusomonadidae	2	0.00280143
Eukaryota	Amoebozoa	Lobosa	2	0.00280143
Eukaryota	Stramenopiles	Ochrophyta	1	0.00140072
Eukaryota	Archaeplastida	Streptophyta	1	0.00140072

## Sheet: Eukaryote eRNA
Domain	Supergroups & kindoms	Phylum	Read abundance	Percentage
Eukaryota	Opisthokonta	Metazoa	67001	93.8495
Eukaryota	Rhizaria	Cercozoa	3078	4.31141
Eukaryota	Alveolata	Ciliophora	421	0.589702
Eukaryota	Rhizaria	Radiolaria	294	0.411811
Eukaryota	Alveolata	Dinophyta	176	0.246526
Eukaryota	Alveolata	Apicomplexa	166	0.232519
Eukaryota	Alveolata	Perkinsea	80	0.112057
Eukaryota	Opisthokonta	Fungi	64	0.0896459
Eukaryota	Archaeplastida	Chlorophyta	54	0.0756387
Eukaryota	Hacrobia	Haptophyta	18	0.0252129
Eukaryota	Opisthokonta	Mesomycetozoa	6	0.0084043
Eukaryota	Opisthokonta	Choanoflagellida	6	0.0084043
Eukaryota	Alveolata	Alveolata_X	6	0.0084043
Eukaryota	Archaeplastida	Streptophyta	5	0.00700359
Eukaryota	Amoebozoa	Amoebozoa_X	4	0.00560287
Eukaryota	Stramenopiles	Stramenopiles_X	3	0.00420215
Eukaryota	Amoebozoa	Lobosa	3	0.00420215
Eukaryota	Amoebozoa	Breviatea	2	0.00280143
Eukaryota	Hacrobia	Centroheliozoa	2	0.00280143
Eukaryota	Opisthokonta	Opisthokonta_X	2	0.00280143
Eukaryota	Apusozoa	Apusomonadidae	1	0.00140072
