# Supplementary material for: Metabarcoding monitoring analysis: the pros and cons of using co-extracted environmental DNA and RNA data to assess offshore oil production impacts on benthic communities
Source: PeerJ. 2017 May 17;5:e3347. doi: 10.7717/peerj.3347 (PMC5437860; doi:10.7717/peerj.3347)
Supplement: Table S6 — eDNA, environmental DNA; eRNA, environmental RNA. [file peerj-05-3347-s007.xlsx]

## Sheet: Bacteria eDNA
Mann-Whitney u test with 999 permutations
Taxonomy
Domain	Phylum	Class	Test-Statistic	P-value	Near_field_mean	Far_field_mean
Archaea	Woesearchaeota	Woesearchaeota_Incertae_Sedis_AR20	4.59622	0.007	0.000585475	0
Bacteria	Chloroflexi	Dehalococcoidetes	2.56986	0.012	0.00109278	0.000345403
Bacteria	Bacteroidetes	Flavobacteriia	2.65679	0.019	0.0294352	0.0215628
Bacteria	Verrucomicrobia	Verrucomicrobiae	2.39149	0.026	0.066043	0.0541996
Bacteria	Acidobacteria	Acidobacteria_Gp5	-1.97566	0.059	0.00072813	0.00134841
Bacteria	Bacteroidetes	Bacteroidetes_incertae_sedis	1.76609	0.074	0.0016005	0.000620203
Archaea	Euryarchaeota	Thermoplasmata	1.73644	0.077	0.000178685	3.98e-05
Bacteria	Elusimicrobia	Elusimicrobia	1.67005	0.082	0.000178685	4.27e-05
Bacteria	Parcubacteria	Parcubacteria_X	-1.73604	0.103	0.0054807	0.00671253
Bacteria	Acidobacteria	Acidobacteria_Gp20	1.67626	0.113	0.000479345	0.000227927
Bacteria	Armatimonadetes	Armatimonadetes_gp7	1.47606	0.13	0.000141193	3.05e-05
Archaea	Euryarchaeota	Archaeoglobi	1.35507	0.135	0.000138737	3.29e-05
Bacteria	Proteobacteria	Deltaproteobacteria	-1.51313	0.143	0.184353	0.191579
Bacteria	Verrucomicrobia	Subdivision3	-1.61902	0.153	0.00198525	0.00296769
Archaea	Euryarchaeota	Halobacteria	1.52991	0.156	0.000633561	0.000237358
Bacteria	Acidobacteria	Acidobacteria_Gp7	-1.44246	0.16	0.00312431	0.00453827
Bacteria	Bacteroidetes	Cytophagia	-1.42175	0.177	0.015069	0.0177506
Bacteria	Cyanobacteria_Chloroplast	Chloroplast	1.37227	0.18	0.0014598	0.000866637
Archaea	Woesearchaeota	Woesearchaeota_Incertae_Sedis_AR18	-1.33058	0.219	4.66e-05	0.000282931
Bacteria	Bacteroidetes	Bacteroidia	1.23169	0.242	0.00103147	0.000730864
Bacteria	Firmicutes	Clostridia	1.23306	0.247	0.0331584	0.0300941
Bacteria	Acidobacteria	Acidobacteria_Gp22	-1.19941	0.25	0.0291798	0.03227
Bacteria	Omnitrophica	Omnitrophica_X	-1.25478	0.252	8.55e-05	0.000430908
Bacteria	Acidobacteria	Acidobacteria_Gp13	-1.22841	0.263	0.000810732	0.00150787
Archaea	Crenarchaeota	Thermoprotei	1.15384	0.27	0.0017989	0.00109898
Bacteria	Chloroflexi	Caldilineae	-1.0738	0.276	0.0010314	0.00158335
Bacteria	Chrysiogenetes	Chrysiogenetes	1.62698	0.286	4.27e-05	0
Bacteria	Chloroflexi	Dehalococcoidia	-1.07765	0.299	0.000128233	0.000267454
Bacteria	candidate_division_WPS-1	candidate_division_WPS-1_X	1.62698	0.303	8.55e-05	0
Bacteria	Fibrobacteres	Fibrobacteria	1.62698	0.303	0.000187882	0
Bacteria	Acidobacteria	Holophagae	1.05123	0.318	0.00088931	0.000606287
Bacteria	Planctomycetes	Planctomycetia	-1.02719	0.319	0.091519	0.0977382
Bacteria	Armatimonadetes	Armatimonadia	-1.00697	0.333	0.00137798	0.00201954
Bacteria	Lentisphaerae	Oligosphaeria	0.993034	0.34	0.00882124	0.00746368
Bacteria	Acidobacteria	Acidobacteria_Gp6	1.02017	0.35	0.0125896	0.0105786
Bacteria	Chloroflexi	Anaerolineae	0.929074	0.351	0.000982258	0.000630665
Bacteria	Tenericutes	Mollicutes	1.00224	0.363	0.00110299	0.000631881
Bacteria	Poribacteria	Poribacteria_X	-0.975478	0.375	0.000802673	0.00112175
Bacteria	Deinococcus-Thermus	Deinococci	0.929873	0.376	0.00146897	0.00112234
Bacteria	Planctomycetes	Phycisphaerae	-0.896434	0.377	0.000394483	0.00077645
Bacteria	Candidatus_Saccharibacteria	Candidatus_Saccharibacteria_X	0.91422	0.383	0.00389887	0.00316141
Bacteria	Synergistetes	Synergistia	-0.933534	0.401	0.000472409	0.00100683
Bacteria	Acidobacteria	Acidobacteria_Gp18	-0.888112	0.402	0.00210947	0.00268092
Bacteria	Elusimicrobia	Endomicrobia	0.90956	0.403	0.00156695	0.00111811
Bacteria	Bacteroidetes	Sphingobacteriia	0.872836	0.404	0.0125735	0.011114
Bacteria	SR1	SR1_X	0.827111	0.417	0.00134425	0.000851746
Bacteria	Dictyoglomi	Dictyoglomia	0.947123	0.419	0.00026305	0.000116063
Bacteria	Acidobacteria	Acidobacteria_Gp17	-0.813269	0.434	0.0080417	0.00889271
Bacteria	Nitrospirae	Nitrospira	0.791946	0.444	0.00242319	0.00196593
Bacteria	Proteobacteria	Gammaproteobacteria	-0.797867	0.459	0.222742	0.229686
Bacteria	Aquificae	Aquificae	-0.591753	0.467	8.55e-05	0.000166746
Bacteria	Firmicutes	Thermolithobacteria	0.776896	0.47	0.000567944	0.000373446
Bacteria	Cyanobacteria_Chloroplast	Cyanobacteria	0.70513	0.471	0.00114797	0.000862239
Bacteria	Proteobacteria	Zetaproteobacteria	1.04228	0.495	0.000150271	4.73e-05
Bacteria	Acidobacteria	Acidobacteria_Gp9	-0.709039	0.513	0.0122025	0.0136403
Bacteria	Acidobacteria	Acidobacteria_Gp4	0.649821	0.513	0.00331015	0.00278612
Bacteria	Chloroflexi	Thermomicrobia	-0.781457	0.514	8.55e-05	0.000192216
Bacteria	Armatimonadetes	Armatimonadetes_gp5	-0.651004	0.529	0.000890708	0.00116957
Bacteria	Acidobacteria	Acidobacteria_Gp26	-0.61156	0.538	0.00261037	0.00310203
Archaea	Woesearchaeota	Woesearchaeota_Incertae_Sedis_AR15	-0.6333	0.548	0	3.09e-05
Bacteria	Proteobacteria	Betaproteobacteria	-0.621166	0.555	0.00217696	0.00264399
Archaea	Euryarchaeota	Methanobacteria	-0.726171	0.567	0.000170977	0.000345909
Archaea	_Euryarchaeota	Halobacteria	-0.936495	0.58	0	4.36e-05
Bacteria	Hydrogenedentes	Candidatus_Hydrogenedens	-0.538414	0.586	0.00414322	0.00466521
Bacteria	Proteobacteria	Epsilonproteobacteria	0.578706	0.599	0.00320635	0.00268377
Archaea	Thaumarchaeota	Nitrosopumilales	0.543554	0.6	0.000645254	0.00052627
Bacteria	Acidobacteria	Acidobacteria_Gp21	0.501316	0.616	0.0049104	0.0044993
Bacteria	Acidobacteria	Acidobacteria_Gp11	0.627764	0.618	0.000190587	9.62e-05
Bacteria	Acidobacteria	Acidobacteria_Gp16	-0.540238	0.619	0.00376687	0.00421329
Bacteria	Actinobacteria	Actinobacteria	0.509168	0.625	0.0231859	0.0218147
Bacteria	Acidobacteria	Acidobacteria_Gp15	0.514998	0.634	0.00142129	0.00120115
Bacteria	Acidobacteria	Acidobacteria_Gp24	-0.459352	0.646	0.000179429	0.000251188
Bacteria	BRC1	BRC1_X	-0.487728	0.653	0.00671025	0.00743283
Bacteria	Armatimonadetes	Armatimonadetes_gp4	0.386077	0.69	0.00336109	0.00302102
Bacteria	Chloroflexi	Ardenticatenia	-0.415185	0.707	8.93e-05	0.000131449
Bacteria	Thermodesulfobacteria	Thermodesulfobacteria	0.385991	0.708	0.000202121	0.000145258
Bacteria	Aminicenantes	Aminicenantes_X	0.381118	0.708	0.00188821	0.00164431
Bacteria	Verrucomicrobia	Opitutae	0.370185	0.712	0.00245195	0.00222846
Bacteria	Deferribacteres	Deferribacteres	-0.377762	0.717	0.00145984	0.00165887
Bacteria	Acidobacteria	Acidobacteria_Gp2	-0.475191	0.72	0.000200723	0.000320591
Bacteria	candidate_division_ZB3	candidate_division_ZB3_X	-0.492156	0.72	0.000190587	0.000343727
Bacteria	Acidobacteria	Acidobacteria_Gp23	-0.36419	0.721	0.00276212	0.0029825
Bacteria	Acidobacteria	Acidobacteria_Gp12	0.418557	0.729	9.46e-05	6.63e-05
Bacteria	Spirochaetes	Spirochaetia	0.347598	0.738	0.00211889	0.00193716
Bacteria	Ignavibacteriae	Ignavibacteria	-0.335116	0.739	0.00106299	0.00120109
Bacteria	Chloroflexi	Ktedonobacteria	0.296747	0.755	0.00137481	0.00123271
Archaea	Pacearchaeota	Pacearchaeota_Incertae_Sedis_AR13	-0.434347	0.759	8.55e-05	0.000153071
Bacteria	Microgenomates	Microgenomates_X	0.379444	0.76	0.000370421	0.000284822
Archaea	Aenigmarchaeota	Candidatus_Aenigmarchaeum	-0.6333	0.774	0	3.29e-05
Bacteria	Chlorobi	Chlorobia	0.267389	0.781	0.000535271	0.000469618
Bacteria	Fusobacteria	Fusobacteriia	0.253268	0.787	0.000658893	0.000554217
Archaea	Woesearchaeota	Woesearchaeota_Incertae_Sedis_AR16	-0.816341	0.788	0	9.84e-05
Bacteria	Thermotogae	Thermotogae	-0.329369	0.789	8.93e-05	0.000132537
Bacteria	Armatimonadetes	Chthonomonadetes	0.280219	0.801	0.000244212	0.000207702
Bacteria	Firmicutes	Bacilli	-0.25411	0.807	0.00664055	0.00696842
Bacteria	Gemmatimonadetes	Gemmatimonadetes	-0.23801	0.808	0.00158182	0.00167176
Bacteria	Nitrospinae	Nitrospinia	0.229224	0.818	0.00184577	0.00173067
Archaea	Euryarchaeota	Methanomicrobia	0.223098	0.828	0.000490475	0.000436619
Bacteria	Acidobacteria	Acidobacteria_Gp1	-0.219207	0.829	0.00596626	0.00621961
Bacteria	Acidobacteria	Acidobacteria_Gp3	-0.231108	0.835	0.00201211	0.00215951
Bacteria	Firmicutes	Erysipelotrichia	-0.62921	0.837	4.27e-05	0.000135177
Bacteria	Verrucomicrobia	Spartobacteria	-0.2096	0.842	0.00457553	0.00477854
Archaea	Nanohaloarchaeota	Candidatus_Nanosalina	-0.454752	0.845	8.55e-05	0.00018269
Bacteria	Proteobacteria	Alphaproteobacteria	0.184785	0.854	0.0710949	0.0704122
Bacteria	Lentisphaerae	Lentisphaeria	-0.19075	0.857	0.000228079	0.000258558
Bacteria	Acidobacteria	Acidobacteria_Gp10	-0.186316	0.858	0.0279247	0.0285145
Bacteria	Verrucomicrobia	Subdivision5	0.17459	0.866	0.00254352	0.00241541
Bacteria	Latescibacteria	Latescibacteria_X	0.162192	0.881	0.0102274	0.0100581
Bacteria	Firmicutes	Negativicutes	0.164479	0.891	0.00321638	0.00310617
Bacteria	Chloroflexi	Chloroflexia	0.151424	0.892	0.000141193	0.000119973
Bacteria	Atribacteria	Atribacteria_X	0.128119	0.893	0.000282358	0.000263246
Bacteria	Acidobacteria	Acidobacteria_Gp19	0.188575	0.898	0.000187791	0.000160308
Bacteria	Actinobacteria	Thermoleophilia	0.1825	0.911	0.000215054	0.000181761
Archaea	Korarchaeota	Candidatus_Korarchaeum	-0.11967	0.92	0.00031217	0.000335641
Bacteria	Armatimonadetes	Armatimonadetes_gp2	0.0926705	0.93	0.00508793	0.00496636
Bacteria	Acidobacteria	Acidobacteria_Gp25	0.0603793	0.954	0.000136685	0.000128558
Bacteria	candidate_division_WPS-2	candidate_division_WPS-2_X	-0.0770295	0.976	0.000179429	0.000191229
Bacteria	Chlamydiae	Chlamydiia	0.0208465	0.978	0.0074947	0.00746067
Archaea	Euryarchaeota	Methanococci	-0.0167637	0.991	0.000442858	0.000447441
Bacteria	Acidobacteria	Acidobacteria_Gp14	-0.0256502	0.999	0.000233331	0.000237801
Bacteria	Acetothermia	Acetothermia_X	0.499895	1	8.55e-05	4.27e-05
Archaea	Nanohaloarchaeota	Nanohaloarchaea	-0.6333	1	0	2.36e-05
Bacteria	Armatimonadetes	Armatimonadetes_gp6	-0.192512	1	4.8e-05	7e-05
Archaea	Diapherotrites	Candidatus_Iainarchaeum	-0.6333	1	0	1.87e-05
Archaea	Euryarchaeota	Thermococci	-0.6333	1	0	1.65e-05

## Sheet: Bacteria eRNA
Mann-Whitney u test with 999 permutations
Taxonomy
Domain	Phylum	Class	Test-Statistic	P-value	Near_field_mean	Far_field_mean
Bacteria	Bacteroidetes	Cytophagia	-3.99934	0.00390392	0.00920025	0.00734859
Bacteria	Acidobacteria	Acidobacteria_Gp9	-4.04826	0.00362201	0.00734859	0.00920025
Bacteria	Acidobacteria	Acidobacteria_Gp4	-3.09669	0	0.00117038	0.142424
Bacteria	Planctomycetes	Planctomycetia	-2.77916	0.0316506	0.0481786	0.00485254
Bacteria	Proteobacteria	Deltaproteobacteria	-2.58214	0.266199	0.310212	0.00114776
Bacteria	Proteobacteria	Gammaproteobacteria	2.49702	0.333658	0.267254	0.00395311
Bacteria	Armatimonadetes	Armatimonadia	-2.51422	0.00112163	0.00238356	0.0417803
Bacteria	Firmicutes	Thermolithobacteria	-2.47731	0	0.000805939	0.0485932
Bacteria	Acidobacteria	Acidobacteria_Gp3	-2.46507	0.00194998	0.00436346	0.0192267
Bacteria	BRC1	BRC1_X	-2.53827	0.00273905	0.00605348	3.58e-05
Bacteria	Verrucomicrobia	Verrucomicrobiae	-2.57966	0.00682667	0.0101123	0.0311676
Bacteria	Firmicutes	Clostridia	-2.39957	0.0210562	0.0270615	0.000482279
Bacteria	Acidobacteria	Acidobacteria_Gp24	-2.18667	0	0.000658113	0.00605348
Bacteria	Acidobacteria	Acidobacteria_Gp17	-2.1976	0.00196614	0.00386232	0.0101123
Bacteria	Acidobacteria	Acidobacteria_Gp6	-1.93179	0.00799352	0.010584	0.000805939
Bacteria	Thermodesulfobacteria	Thermodesulfobacteria	2.19782	0.00056136	3.16496e-05	0.00436345
Archaea	Korarchaeota	Candidatus_Korarchaeum	-1.96113	0	0.000274852	0.00545196
Bacteria	Firmicutes	Negativicutes	-1.75768	0.00197769	0.00309849	0.00238356
Bacteria	Planctomycetes	Phycisphaerae	-1.66939	0	0.000385747	0.00319726
Bacteria	Verrucomicrobia	Subdivision5	-1.66724	0.000640572	0.00137442	0.00386232
Bacteria	Nitrospirae	Nitrospira	-1.74798	0.00140336	0.00236688	0.00094954
Bacteria	Cyanobacteria_Chloroplast	Cyanobacteria	-1.5515	0.000414815	0.00102891	0.000475739
Bacteria	Chlamydiae	Chlamydiia	-1.69619	0.00101737	0.00236773	0.0745459
Bacteria	Hydrogenedentes	Candidatus_Hydrogenedens	-1.61587	0.00678886	0.0103425	0.000658114
Bacteria	Spirochaetes	Spirochaetia	1.62976	0.00626157	0.00336678	0.00996821
Bacteria	Gemmatimonadetes	Gemmatimonadetes	-1.55286	0.00172466	0.00305673	0.0600936
Bacteria	Atribacteria	Atribacteria_X	1.56793	0.001847	0.00087783	3.16e-05
Bacteria	Acidobacteria	Acidobacteria_Gp22	-1.45583	0.0404012	0.0527688	0.000329271
Bacteria	Proteobacteria	Alphaproteobacteria	1.59187	0.0768884	0.0666299	0.010584
Bacteria	Fusobacteria	Fusobacteriia	1.60978	0.0334587	0.000646537	0.000274852
Bacteria	Acidobacteria	Acidobacteria_Gp7	-1.19135	0.00291477	0.00433226	0.00236773
Bacteria	Firmicutes	Bacilli	1.48377	0.0180922	0.00635382	0.00309849
Bacteria	Acidobacteria	Acidobacteria_Gp12	-1.12638	0	0.000220548	0.00120474
Archaea	Euryarchaeota	Thermoplasmata	1.18939	0.000120265	2.26203e-05	0.00336678
Bacteria	Candidatus_Saccharibacteria	Candidatus_Saccharibacteria_X	-1.33494	0	0.000233555	0.00467729
Bacteria	Acidobacteria	Acidobacteria_Gp23	0.956046	0.00306977	0.00210839	0.00236688
Bacteria	Deinococcus-Thermus	Deinococci	-0.941982	0.00124346	0.00191914	0.000385747
Bacteria	Cyanobacteria_Chloroplast	Chloroplast	-1.05787	0.00017301	0.000652772	0.00139682
Bacteria	Armatimonadetes	Armatimonadetes_gp2	0.933976	0.00474602	0.00355131	0.00137442
Bacteria	Acidobacteria	Acidobacteria_Gp15	-0.881387	0.00112305	0.00154874	0.000643181
Bacteria	candidate_division_ZB3	candidate_division_ZB3_X	-1.06962	0	0.000353548	0.00087783
Bacteria	Acidobacteria	Acidobacteria_Gp10	-0.845661	0.0153327	0.017404	5.5e-05
Bacteria	Synergistetes	Synergistia	-0.881705	0.0006829	0.0012433	0.0103425
Bacteria	Armatimonadetes	Armatimonadetes_gp5	-1.10389	0	0.000164789	0.00103776
Bacteria	Proteobacteria	Betaproteobacteria	0.799104	0.00210036	0.00148611	0.00305673
Bacteria	Bacteroidetes	Bacteroidia	0.848055	0.0015204	0.00092344	0.0527688
Bacteria	Armatimonadetes	Chthonomonadetes	0.713888	0.000586695	0.000291215	0.000218087
Bacteria	Acetothermia	Acetothermia_X	-1.11418	0	0.000178699	0.0209146
Bacteria	Acidobacteria	Acidobacteria_Gp14	-1.0363	0	0.000349991	0.000300052
Bacteria	Acidobacteria	Acidobacteria_Gp5	-0.687	0.000721877	0.00108707	0.000118146
Bacteria	Acidobacteria	Acidobacteria_Gp20	0.838721	0.000654358	0.00034956	0.000646537
Bacteria	Bacteroidetes	Sphingobacteriia	-0.75944	0.0051618	0.0062434	0.00125912
Archaea	Euryarchaeota	Halobacteria	-1.18734	0	0.000143678	3.16e-05
Bacteria	Elusimicrobia	Elusimicrobia	-1.19504	0	0.000172056	0.00433226
Bacteria	Lentisphaerae	Lentisphaeria	-0.924113	0	5.42699e-05	4.26e-05
Bacteria	Deferribacteres	Deferribacteres	-0.617381	0.00100009	0.00132836	0.000453464
Bacteria	Aquificae	Aquificae	-0.931719	0	8.10061e-05	3.16e-05
Bacteria	Acidobacteria	Acidobacteria_Gp26	0.573932	0.00137817	0.00104746	0.00249259
Bacteria	Ignavibacteriae	Ignavibacteria	-0.584883	0.00017301	0.000320041	0.00517865
Bacteria	Acidobacteria	Acidobacteria_Gp11	0.920553	0.000346021	0.000115206	0.00108121
Bacteria	Bacteroidetes	Bacteroidetes_incertae_sedis	-0.649049	0.000293275	0.000548499	0.00020816
Bacteria	Actinobacteria	Actinobacteria	-0.574408	0.0131088	0.0144441	0.0455856
Archaea	Euryarchaeota	Methanococci	-0.937577	0	0.000134101	0.000220549
Bacteria	Verrucomicrobia	Subdivision3	-0.597403	0.0030764	0.00370572	0
Bacteria	Poribacteria	Poribacteria_X	-0.543199	0.000414815	0.000684372	0.0032939
Bacteria	Thermotogae	Thermotogae	0.831879	0.000346021	0.000130301	2.26e-05
Bacteria	Dictyoglomi	Dictyoglomia	0.50443	0.00056136	0.000364105	0
Bacteria	Acidobacteria	Acidobacteria_Gp19	0.694996	0.000346021	0.000163283	2.26e-05
Bacteria	Chloroflexi	Dehalococcoidia	0.700897	0.00038835	0.000173455	0.00917912
Archaea	Woesearchaeota	Woesearchaeota_Incertae_Sedis_AR16	-0.909278	0	8.88998e-05	0.000210726
Bacteria	Latescibacteria	Latescibacteria_X	-0.449651	0.0128599	0.0141955	0.000784358
Archaea	Crenarchaeota	Thermoprotei	0.657014	0.000240674	0.000113384	0.00223824
Bacteria	Acidobacteria	Acidobacteria_Gp2	-0.496224	0.00017301	0.000355868	0.000233555
Bacteria	Acidobacteria	Holophagae	-0.448799	0.000869697	0.00116113	0.000652772
Bacteria	Verrucomicrobia	Spartobacteria	0.397601	0.00172466	0.00148266	0.00210839
Archaea	Thaumarchaeota	Nitrosopumilales	-0.527834	0.00017301	0.000294062	0.0493601
Bacteria	SR1	SR1_X	0.624662	0.00017301	8.45932e-05	0.0273101
Bacteria	Acidobacteria	Acidobacteria_Gp1	-0.443511	0.0043301	0.00484018	0.00355131
Bacteria	Chloroflexi	Anaerolineae	0.412227	0.000865052	0.000606706	0.00154874
Bacteria	Chlorobi	Chlorobia	-0.301628	0.000481348	0.000612143	0.0012433
Bacteria	Firmicutes	Erysipelotrichia	-0.137783	0.000120265	0.000139563	0.000353549
Bacteria	Actinobacteria	Thermoleophilia	-0.866476	0	0.000102451	0.017404
Bacteria	Fibrobacteres	Fibrobacteria	-0.825741	0	0.000141653	0.00092344
Bacteria	Chloroflexi	Ardenticatenia	-0.864995	0	0.00010318	0.000178699
Bacteria	Chloroflexi	Ktedonobacteria	0.227471	0.000414815	0.000355021	0.000164789
Bacteria	Verrucomicrobia	Opitutae	0.280203	0.00272827	0.00244486	0.00371627
Bacteria	Acidobacteria	Acidobacteria_Gp16	-0.288503	0.00205562	0.00228175	0.000291215
Bacteria	Parcubacteria	Parcubacteria_X	-0.241751	0.00255524	0.00273865	0.000332229
Bacteria	Acidobacteria	Acidobacteria_Gp21	-0.211118	0.00455879	0.00468756	0.000349991
Bacteria	Chloroflexi	Chloroflexia	0.296945	0.00038835	0.000289246	0.00034956
Bacteria	Nitrospinae	Nitrospinia	-0.207911	0.00108296	0.00122895	0.00108707
Bacteria	Acidobacteria	Acidobacteria_Gp13	-0.162786	0.00116283	0.00122349	0.0062434
Bacteria	Chloroflexi	Caldilineae	0.259492	0.000294551	0.000231869	0.00145907
Bacteria	Chloroflexi	Thermomicrobia	0.184164	0.000414815	0.000359422	0.000172056
Bacteria	Tenericutes	Mollicutes	-0.0780668	0.000360938	0.000379951	0.000143678
Bacteria	Lentisphaerae	Oligosphaeria	-0.0630105	0.00543118	0.00550918	0.00132836
Bacteria	Acidobacteria	Acidobacteria_Gp18	0.0787436	0.00328513	0.00317274	0.0146301
Bacteria	Chloroflexi	Dehalococcoidetes	-0.218039	0.000120265	0.000157356	0.00104746
Bacteria	Elusimicrobia	Endomicrobia	-0.0194325	0.000776699	0.000789025	0.00370572
Bacteria	Bacteroidetes	Flavobacteriia	-0.0513118	0.013424	0.0135631	0.00639829
Bacteria	Proteobacteria	Epsilonproteobacteria	-0.0197594	0.00191916	0.00193761	0.00014274
Bacteria	Armatimonadetes	Armatimonadetes_gp4	0.0148173	0.000749143	0.000743468	8.1e-05
Bacteria	candidate_division_WPS-2	candidate_division_WPS-2_X	0.0237847	0.00017301	0.000168272	5.43e-05
Archaea	Euryarchaeota	Methanomicrobia	-0.6333	0	4.38597e-05	0.000134101
Archaea	Euryarchaeota	Archaeoglobi	-0.6333	0	3.39305e-05	0.000107913
Bacteria	candidate_division_WPS-1	candidate_division_WPS-1_X	-0.6333	0	2.26203e-05	0.000364105
Bacteria	Armatimonadetes	Armatimonadetes_gp6	-0.6333	0	5.29437e-05	0.000584737
Bacteria	Chloroflexi	Thermoflexia	-0.6333	0	5.29437e-05	0.000320041
Archaea	_Euryarchaeota	Halobacteria	-0.6333	0	4.38597e-05	0.000115206
Archaea	Nanohaloarchaeota	Candidatus_Nanosalina	-0.6333	0	8.51643e-05	0.000130302
Bacteria	Acidobacteria	Acidobacteria_Gp25	-0.6333	0	9.08761e-05	0.000684372
Archaea	Euryarchaeota	Thermococci	-0.6333	0	5.49692e-05	0.000249167
Archaea	Woesearchaeota	Woesearchaeota_Incertae_Sedis_AR15	-0.6333	0	5.49692e-05	0.000355868
Bacteria	Aminicenantes	Aminicenantes_X	0.219358	0.000346021	0.000267927	0.000163283
Archaea	Nanohaloarchaeota	Nanohaloarchaea	-0.6333	0	2.26203e-05	0.000173455
Archaea	Pacearchaeota	Pacearchaeota_Incertae_Sedis_AR13	-0.6333	0	9.49487e-05	0.00035557

## Sheet: Eukaryote eDNA
Mann-Whitney u test with 999 permutations
Taxonomy
Domain	Supergroups & kingdoms	Phylum	Test-Statistic	P-value	Near_field_mean	Far_field_mean
Eukaryota	Archaeplastida	Streptophyta	2.19388	0.02	0.0166372	0.000707105
Eukaryota	Hacrobia	Katablepharidophyta	2.37863	0.06	0.000393069	0
Eukaryota	Rhizaria	Cercozoa	-1.67241	0.112	0.0488565	0.0699951
Eukaryota	Alveolata	Ciliophora	1.56392	0.152	0.0211968	0.0104387
Eukaryota	Rhizaria	Radiolaria	-1.13434	0.237	0.0159094	0.0401863
Eukaryota	Amoebozoa	Amoebozoa_X	1.36161	0.237	0.00234522	0.000561138
Eukaryota	Archaeplastida	Chlorophyta	1.15699	0.238	0.00487968	0.00214522
Eukaryota	Stramenopiles	Stramenopiles_X	1.55231	0.247	0.00040783	4.63e-05
Eukaryota	Archaeplastida	Glaucophyta	1.87083	0.253	6.8e-05	0
Eukaryota	Apusozoa	Hilomonadea	1.87083	0.264	0.000120337	0
Eukaryota	Excavata	Metamonada	1.87083	0.268	0.000234522	0
Eukaryota	Hacrobia	Telonemia	0.862922	0.359	0.00160735	0.00100198
Eukaryota	Hacrobia	Hacrobia_X	-1.0299	0.393	0	0.00100034
Eukaryota	Amoebozoa	Lobosa	-0.730847	0.51	0.000203915	0.00259582
Eukaryota	Alveolata	Alveolata_X	-0.60116	0.592	0.00451917	0.00727765
Eukaryota	Opisthokonta	Metazoa	0.492014	0.625	0.599825	0.552227
Eukaryota	Alveolata	Perkinsea	0.435389	0.672	0.0116096	0.0101911
Eukaryota	Eukaryota_X	Eukaryota_XX	0.671374	0.691	0.00139525	0.000723817
Eukaryota	Hacrobia	Haptophyta	0.348188	0.722	0.000766767	0.000572296
Eukaryota	Stramenopiles	Ochrophyta	-0.762766	0.724	0	0.000439203
Eukaryota	Alveolata	Apicomplexa	-0.424061	0.726	0.0914199	0.110944
Eukaryota	Alveolata	Dinophyta	-0.234897	0.815	0.148726	0.158561
Eukaryota	Opisthokonta	Fungi	0.275846	0.818	0.0169867	0.014899
Eukaryota	Apusozoa	Apusomonadidae	-0.246378	0.865	0.00377583	0.00472617
Eukaryota	Amoebozoa	Breviatea	-0.149111	0.869	0.00213296	0.00240187
Eukaryota	Opisthokonta	Mesomycetozoa	-0.143767	0.909	0.000135944	0.000173105
Eukaryota	Hacrobia	Centroheliozoa	0.0754141	0.931	0.00263585	0.00234161
Eukaryota	Opisthokonta	Opisthokonta_X	-0.499557	0.962	9.38e-05	0.000633304
Eukaryota	Opisthokonta	Choanoflagellida	0.00342601	0.997	0.00230367	0.00229876
Eukaryota	Archaeplastida	Rhodophyta	-0.412189	1	0.000271887	0.00101866
Eukaryota	Excavata	Discoba	-0.564076	1	0	0.00162357
Eukaryota	Hacrobia	Cryptophyta	0.486367	1	0.000541516	0.000269687

## Sheet: Eukaryote eRNA
Mann-Whitney u test with 999 permutations
Taxonomy
Domain	Supergroups & kingdoms	Phylum	Test-Statistic	P-value	Near_field_mean	Far_field_mean
Eukaryota	Stramenopiles	Stramenopiles_X	-2.18844	0.039	0.00067668	0.00213302
Eukaryota	Opisthokonta	Fungi	-2.10185	0.042	0.0287548	0.0413322
Eukaryota	Apusozoa	Hilomonadea	-1.80646	0.074	0.00027351	0.000879254
Eukaryota	Archaeplastida	Chlorophyta	-1.87436	0.079	0.000101215	0.000850198
Eukaryota	Apusozoa	Apusomonadidae	-1.72605	0.098	0.00490711	0.00866515
Eukaryota	Hacrobia	Haptophyta	-1.43519	0.126	0	0.000446349
Eukaryota	Alveolata	Ciliophora	1.41288	0.172	0.265445	0.203893
Eukaryota	Amoebozoa	Amoebozoa_X	1.38478	0.173	0.0369464	0.0235312
Eukaryota	Archaeplastida	Rhodophyta	-1.33178	0.175	0	0.00134389
Eukaryota	Rhizaria	Radiolaria	1.3924	0.184	0.0125075	0.00813346
Eukaryota	Stramenopiles	Ochrophyta	1.23665	0.227	0.0126954	0.0102529
Eukaryota	Excavata	Metamonada	-1.22762	0.25	0.000609203	0.00164891
Eukaryota	Alveolata	Perkinsea	-1.0578	0.293	0.00295053	0.00519443
Eukaryota	Hacrobia	Katablepharidophyta	1.30451	0.306	0.000412067	0.000137502
Eukaryota	Opisthokonta	Choanoflagellida	-1.07088	0.311	0.00954044	0.0123872
Eukaryota	Alveolata	Alveolata_X	-0.994389	0.337	0.000101215	0.000261035
Eukaryota	Hacrobia	Centroheliozoa	1.03907	0.351	0.00161165	0.000858783
Eukaryota	Hacrobia	Cryptophyta	-0.933883	0.355	0.0010994	0.00186567
Eukaryota	Archaeplastida	Streptophyta	-0.746965	0.373	0.00300486	0.0158088
Eukaryota	Amoebozoa	Conosa	-0.803213	0.448	0.00248535	0.00347275
Eukaryota	Hacrobia	Telonemia	0.795836	0.472	0.000507989	0.00026448
Eukaryota	Amoebozoa	Lobosa	0.731412	0.501	0.0113834	0.00903643
Eukaryota	Alveolata	Apicomplexa	-0.700119	0.509	0.0145377	0.0182934
Eukaryota	Alveolata	Dinophyta	-0.53296	0.616	0.0190662	0.0217218
Eukaryota	Opisthokonta	Metazoa	-0.465121	0.641	0.350494	0.386288
Eukaryota	Hacrobia	Picobiliphyta	-0.47774	0.718	0.000335694	0.000564773
Eukaryota	Amoebozoa	Breviatea	0.342045	0.825	0.000940198	0.000740096
Eukaryota	Opisthokonta	Opisthokonta_X	-0.184267	0.868	0.00178974	0.00197142
Eukaryota	Excavata	Discoba	0.578674	0.921	0.00034459	0.000177316
Eukaryota	Rhizaria	Cercozoa	-0.0445582	0.961	0.215108	0.216402
Eukaryota	Opisthokonta	Mesomycetozoa	-0.0402185	0.975	0.00136946	0.0014185
Eukaryota	Rhizaria	Foraminifera	-0.564076	1	0	2.64e-05
